# Supplementary material for: Oral and intravenous transmission of α-synuclein fibrils to mice
Source: Springer Nature journal article supplement (doi:10.1007/s00401-019-02037-5), 2019-06-22
Supplement: MOESM1 [file 16843968]

**Table S1** Antibodies used for immunofluorescence, immunohistochemistry, and western blotting

| Target (alternative name) [antibody clone]                  | Source          | Catalogue number | Host   | Dilution (IF/IHC) | Antigen retrieval | Dilution (WB) |
|-------------------------------------------------------------|-----------------|------------------|--------|-------------------|-------------------|---------------|
| alpha-Synuclein (fibrillar) [Syn-F1]                        | Biolegend       | 847802           | Mouse  | 1:500             | Citrate buffer    | –             |
| alpha-Synuclein (oligomeric and fibrillar) [Syn-O2]         | Biolegend       | 847602           | Mouse  | 1:500             | Citrate buffer    | –             |
| alpha-Synuclein (phospho S129) [EP1536Y]                    | Abcam           | AB51253          | Rabbit | 1:200             | Citrate buffer    | 1:1000        |
| alpha-Synuclein (phospho S129) [pSyn#64]                    | Wako            | 015-25191        | Mouse  | 1:1200            | Citrate buffer    | –             |
| alpha-Synuclein (phospho S129) [pSyn#64], biotin-conjugated | Wako            | 010-26481        | Mouse  | 1:1000            | Citrate buffer    | –             |
| GAPDH                                                       | Abcam           | ab226408         |        |                   |                   | 1:1000        |
| Glial fibrillary acidic protein (GFAP)                      | Dako            | Z0334            | Rabbit | 1:400             | Citrate buffer    | –             |
| Iba1                                                        | Wako            | 019-19741        | Rabbit | 1:500             | Citrate buffer    | –             |
| p62 (sequestosome-1)                                        | Proteintech     | 18420-1-AP       | Rabbit | 1:100             | Citrate buffer    | –             |
| Ubiquitin (Ubi-1)                                           | Merck Millipore | MAB1510          | Mouse  | 1:500             | Formic acid       | –             |
