# Supplementary material for: Oral and intravenous transmission of α-synuclein fibrils to mice
Source: Springer Nature journal article supplement (doi:10.1007/s00401-019-02037-5), 2019-06-22
Supplement: MOESM7 [file 16843968]

Oral and intravenous transmission of  $\alpha$ -synuclein fibrils to mice

Acta Neuropathologica

Stephanie Lohmann,<sup>1</sup> Maria E. Bernis,<sup>1</sup> Babila J. Tachu,<sup>1</sup> Alexandra Ziemski,<sup>3</sup> Jessica Grigoletto,<sup>1</sup> and Gültekin Tamgüney<sup>1,2,3</sup>

1 German Center for Neurodegenerative Diseases (DZNE), Sigmund-Freud-Straße 27, 53127 Bonn, Germany

2 Institute of Complex Systems, Structural Biochemistry (ICS-6), Forschungszentrum Jülich GmbH, Wilhelm-Johnen-Straße, 52425 Jülich, Germany

3 Institut für Physikalische Biologie, Heinrich-Heine-Universität Düsseldorf, Universitätsstraße 1, 40225 Düsseldorf, Germany

Correspondence to: Gültekin Tamgüney,

Institute of Complex Systems, Structural Biochemistry (ICS-6), Forschungszentrum Jülich GmbH, Wilhelm-Johnen-Straße, 52425 Jülich, Germany

E-mail: erdem@fz-juelich.de

Telephone: +49-151-61324989

Fax: +49-2461-612023

**Online Resource 2** Deposits of phosphorylated  $\alpha$ -synuclein accumulate in the motor cortex of diseased TgM83<sup>+/-</sup> mice

Immunohistochemical staining with an antibody to  $\alpha$ -synuclein phosphorylated at Ser129 revealed that diseased animals had accumulated deposits of phosphorylated  $\alpha$ -synuclein in neuronal cell somata (arrow heads) and neurites (arrows) of the motor cortex (**a**). To assess pathology in the motor cortex in dependence on the route of inoculation, we separately counted the number of somata (**b**) and neurites (**c**) with  $\alpha$ -synuclein pathology in each cortical layer (I, II-III, IV, V, VI). In the motor cortex, pathology was most pronounced after intracerebral inoculation and weakest after intraperitoneal inoculation, and intermediate after oral or intravenous challenge. Cell body pathology was absent in layer I and most pronounced in layer V. Neurites were sparsely present in layer I but frequent in all other layers. Data are presented as mean  $\pm$  standard deviation and are derived from three to four animals per inoculation group. WM: white matter. Scale bars = 200  $\mu$ m.

**Online Resource 3** Deposits of phosphorylated  $\alpha$ -synuclein colocalize with ubiquitin in the spinal cord of diseased TgM83<sup>+/-</sup> mice

Immunofluorescence staining of tissue sections of the spinal cord show that phosphorylated  $\alpha$ -synuclein (red), detected with the EP1536Y antibody, and ubiquitin (green) colocalize in affected neurons of diseased mice. We observed similar results regardless of the route of challenge. Neurons of BSA-challenged mice, for which only merged images are shown, did not accumulate any excessively phosphorylated  $\alpha$ -synuclein or ubiquitinated protein deposits. Nuclear staining with DAPI is shown in blue. Scale bar = 20  $\mu$ m.

**Online Resource 4** Deposits of phosphorylated  $\alpha$ -synuclein colocalize with p62 in the spinal cord of diseased TgM83<sup>+/-</sup> mice

Immunofluorescence staining of tissue sections of the spinal cord show that phosphorylated  $\alpha$ -synuclein (red), detected with the pSyn#64 antibody, and p62 (green) colocalize in affected neurons of diseased mice. We observed similar results regardless of the route of challenge. Neurons of BSA-challenged mice, for which only merged images are shown, did not accumulate any excessively phosphorylated  $\alpha$ -synuclein or p62-tagged protein deposits. Nuclear staining with DAPI is shown in blue. Scale bar = 20  $\mu$ m.

**Online Resource 5** Astrogliosis in the spinal cord of diseased TgM83<sup>+/-</sup> mice

Immunofluorescence staining of spinal cord tissue sections with an antibody against GFAP, a marker for astrocytes, shows that neurons of diseased TgM83<sup>+/-</sup> mice with deposits of phosphorylated  $\alpha$ -synuclein (red), which were detected with the pSyn#64 antibody, were frequently surrounded by reactive astrocytes (green). In contrast, no excessive abundance of phosphorylated  $\alpha$ -synuclein or reactive astrocytes was observed in the spinal cord of BSA-challenged, healthy control mice. Nuclear staining with DAPI is shown in blue. Scale bar = 20  $\mu$ m.

**Online Resource 6** Microgliosis in the spinal cord of diseased TgM83<sup>+/-</sup> mice

Immunofluorescence staining of spinal cord tissue sections with an antibody against IBA-1, a marker for microglia, shows that neurons of diseased TgM83<sup>+/-</sup> mice with deposits of phosphorylated  $\alpha$ -synuclein (red), which were detected with the pSyn#64 antibody, were frequently surrounded by activated microglia (green) with an amoeboid morphology. In contrast, no excessive abundance of phosphorylated  $\alpha$ -

synuclein or activated microglia was observed in the spinal cord of BSA-challenged, healthy control mice. Nuclear staining with DAPI is shown in blue. Scale bar = 20  $\mu\text{m}$ .
